# Supplementary material for: Kinetic deflection change due to target global curvature as revealed by NASA/DART
Source: Research Square preprint supplement (doi:10.21203/rs.3.rs-3598104/v1), 2024-01-16
Supplement: Supplementary file 1 [file e60ebd2de0b9735517d805c7.pdf]

# **Supplementary Information about Kinetic deflection change due to target global curvature as revealed by NASA/DART**

Prepared by Hirabayashi et al.

## **ABSTRACT**

This Supplemental Information material contains three supplementary tables. Supplementary Table S.1 provides the parameters for iSALE simulations and  $\pi$ -scaling relationship analysis. Supplementary Table S.2 shows the spacecraft and Dimorphos orientations at the time of impact. Supplementary Table S.3 compiles the parameters for the catastrophic disruption thresholds.

## Supplementary Tables

**Table S1.** Parameters for comparison tests.  $\pi$ -scaling parameters  $K_1$  and  $\mu$  assume dry sands and rocks. The uncertainties provided are  $1\sigma$ .

| Quantity                                            | Notations | Value                  |                        | Units             |
|-----------------------------------------------------|-----------|------------------------|------------------------|-------------------|
|                                                     | [-]       | Impactor               | Target                 |                   |
| Equivalent diameter                                 | [-]       | 2.4                    | 150                    | m                 |
| Impact speed                                        | [-]       | 6                      | 0                      | km/s <sup>3</sup> |
| Total mass                                          | [-]       | 580                    | $3.4 \times 10^9$      | kg                |
| Bulk density                                        | $\rho$    | 107                    | 1,925                  | kg/s <sup>3</sup> |
| Cohesive strength                                   | $Y$       | 1                      | 1                      | Pa                |
| <i>Maxwell-Z model<sup>a</sup></i>                  |           |                        |                        |                   |
| $\pi$ -scaling parameter                            | $K_1$     | [-]                    | $0.22 \pm 0.02$        | [-]               |
| $\pi$ -scaling parameter                            | $\mu$     | [-]                    | $0.47 \pm 0.07$        | [-]               |
| <i>iSALE-2D simulations</i>                         |           |                        |                        |                   |
| Material                                            | [-]       | Aluminium              | Basalt                 | [-]               |
| Equation of state                                   | [-]       | Tillotson <sup>b</sup> | Tillotson <sup>c</sup> | [-]               |
| Strength model                                      | [-]       | Johnson-Cook           | LUNDD                  | [-]               |
| Poisson ratio                                       | [-]       | 0.33                   | 0.25                   | [-]               |
| <i>LUND strength parameters<sup>d</sup></i>         |           |                        |                        |                   |
| Strength at zero pressure                           | [-]       | [-]                    | 1                      | Pa                |
| Strength at infinite pressure                       | [-]       | [-]                    | 3.5                    | GPa               |
| Internal friction coefficient (damaged)             | [-]       | [-]                    | 0.55                   | Pa                |
| <i>Johnson-Cook strength parameters<sup>e</sup></i> |           |                        |                        |                   |
| Strain coefficient A                                | [-]       | 244                    | [-]                    | MPa               |
| Strain coefficient B                                | [-]       | 488                    | [-]                    | MPa               |
| Strain exponent                                     | [-]       | 0.50                   | [-]                    | MPa               |
| Strain rate coefficient                             | [-]       | 0.02                   | [-]                    | MPa               |
| Thermal softening                                   | [-]       | 1.7                    | [-]                    | MPa               |
| <i>Porosity model parameters<sup>f</sup></i>        |           |                        |                        |                   |
| Initial porosity                                    | [-]       | [-]                    | 45%                    | [-]               |
| Initial distension                                  | [-]       | [-]                    | 1.80                   | [-]               |
| Distension at transition to power-law               | [-]       | [-]                    | 1.00                   | [-]               |
| Elastic volumetric strain threshold                 | [-]       | [-]                    | $-1.88 \times 10^{-9}$ | [-]               |
| Exponential compaction rate                         | [-]       | [-]                    | 0.99                   | [-]               |

<sup>a</sup>(24); <sup>b</sup>(72); <sup>c</sup>(73); <sup>d</sup>(45); <sup>e</sup>(74); <sup>f</sup>(46)

**Table S2.** Unit vector quantities for orbital motions of Dimorphos and spacecraft at the DART impact. The along-track unit vector of Dimorphos is given on September 26, 2022, at 23:14:24.183 UTC. DART's incident unit vector and negative (−) solar panel unit vector are given on September 26, 2022, at 23:14:24 UTC because of the unavailability of data samples at the actual impact time.

| Quantity                               | Notation   | Value                    | Units | Frame     |
|----------------------------------------|------------|--------------------------|-------|-----------|
| Dimorphos along-track unit vector, $x$ | $x_{Dimo}$ | $-1.0902 \times 10^{-1}$ | [-]   | Dimorphos |
| Dimorphos along-track unit vector, $y$ | $y_{Dimo}$ | $9.9404 \times 10^{-1}$  | [-]   | Dimorphos |
| Dimorphos along-track unit vector, $z$ | $z_{Dimo}$ | $2.1239 \times 10^{-14}$ | [-]   | Dimorphos |
| DART incident unit vector, $x$         | $x_{DART}$ | $-1.7299 \times 10^{-1}$ | [-]   | Dimorphos |
| DART incident unit vector, $y$         | $y_{DART}$ | $9.7050 \times 10^{-1}$  | [-]   | Dimorphos |
| DART incident unit vector, $z$         | $z_{DART}$ | $1.6794 \times 10^{-1}$  | [-]   | Dimorphos |
| − DART solar panel unit vector, $x$    | $x_{SPne}$ | $2.5866 \times 10^{-2}$  | [-]   | Dimorphos |
| − DART solar panel unit vector, $y$    | $y_{SPne}$ | $-1.6145 \times 10^{-1}$ | [-]   | Dimorphos |
| − DART solar panel unit vector, $z$    | $z_{SPne}$ | $9.8654 \times 10^{-1}$  | [-]   | Dimorphos |

**Table S3.** Empirical parameters to compute scaling functions of strength,  $\sigma_T$ , and disrupting target radius,  $R_{Q_D}^*$ . The provided values for Equations (20, 23, 24) are based on earlier work (49, 79). The results gives  $R_{Q_D}^*$  and  $Y$  for the three bulk densities: 1000 kg/m<sup>3</sup>, 2000 kg/m<sup>3</sup>, and 4000 kg/m<sup>3</sup>.

| Parameters                            | Units                                                   | Pumice (strength)     | Basalt (strength)     | Strengthless         |
|---------------------------------------|---------------------------------------------------------|-----------------------|-----------------------|----------------------|
| <i>Equation (20)</i>                  |                                                         |                       |                       |                      |
| $Q_0$                                 | J/kg                                                    | $1.0 \times 10^4$     | $2.9 \times 10^3$     | [-]                  |
| $a_s$                                 | [-]                                                     | -0.45                 | -0.35                 | [-]                  |
| $b_s$                                 | [-]                                                     | 1.22                  | 1.29                  | [-]                  |
| $B$                                   | Jm <sup>3</sup> /kg <sup>2</sup>                        | $5.70 \times 10^{-7}$ | $1.50 \times 10^{-7}$ | [-]                  |
| <i>Equation (23)</i>                  |                                                         |                       |                       |                      |
| $m$                                   | [-]                                                     | 9.5                   | 9.5                   | [-]                  |
| $\sigma_T(1.5cm)$                     | MPa                                                     | 3.2                   | 32                    | [-]                  |
| <i>Equation (24)</i>                  |                                                         |                       |                       |                      |
| $a_g$                                 | J/(m <sup>3</sup> s <sup>-2+3<math>\mu_g</math></sup> ) | [-]                   | [-]                   | $1.0 \times 10^{-4}$ |
| $\mu_g$                               | [-]                                                     | [-]                   | [-]                   | 0.39                 |
| <i>Results</i>                        |                                                         |                       |                       |                      |
| $R_{Q_D}^*$ (1000 kg/m <sup>3</sup> ) | m                                                       | 16                    | 16                    | 53                   |
| $R_{Q_D}^*$ (2000 kg/m <sup>3</sup> ) | m                                                       | 13                    | 13                    | 42                   |
| $R_{Q_D}^*$ (4000 kg/m <sup>3</sup> ) | m                                                       | 10                    | 10                    | 33                   |
| $Y$ (1000 kg/m <sup>3</sup> )         | MPa                                                     | 0.37                  | 4.4                   | 0.01                 |
| $Y$ (2000 kg/m <sup>3</sup> )         | MPa                                                     | 0.39                  | 4.7                   | 0.01                 |
| $Y$ (4000 kg/m <sup>3</sup> )         | MPa                                                     | 0.42                  | 5.1                   | 0.01                 |
